# Supplementary material
Source: PubMed Central journal article supplement (PMC5885285)
Supplement: NIHMS953163-supplement-Supplemental_table1.pdf [file NIHMS953163-supplement-Supplemental_table1.pdf]

**Supplemental Table 1. Echocardiographic and hemodynamic differences between the groups without mild MR pigs**

|                            | Group difference      |                    |         |      | Multiple logistic regression |             |         |
|----------------------------|-----------------------|--------------------|---------|------|------------------------------|-------------|---------|
|                            | Early death<br>(n=13) | Survived<br>(n=24) | p-value | AUC  | Odds Ratio                   | 95% CI      | p-value |
| EROA (mm <sup>2</sup> )    | 0.20±0.06             | 0.14±0.06          | 0.03    | 0.72 |                              |             |         |
| RF (%)                     | 60.2±9.3              | 49.7±12.3          | 0.01    | 0.73 | 1.18                         | 1.02 - 1.35 | 0.02    |
| MR volume (ml)             | 22.5±7.1              | 17.8±6.7           | 0.05    | 0.7  |                              |             |         |
| MR degree                  |                       |                    | 0.02    | 0.7  |                              |             |         |
| Mild                       | 0                     | 0                  |         |      |                              |             |         |
| Moderate                   | 2                     | 12                 |         |      |                              |             |         |
| Severe                     | 11                    | 10                 |         |      |                              |             |         |
| MR jet                     |                       |                    | 0.12    | 0.63 |                              |             |         |
| Central                    | 11                    | 13                 |         |      |                              |             |         |
| Eccentric                  | 2                     | 11                 |         |      |                              |             |         |
| Vena contracta (mm)        | 5.9±1.4               | 5.0±1.2            | 0.04    | 0.69 | 3.2                          | 1.14 - 8.99 | 0.03    |
| MR area (cm <sup>2</sup> ) | 4.0±1.1               | 3.6±1.3            | 0.47    | 0.61 |                              |             |         |
| LA area (cm <sup>2</sup> ) | 7.1±1.3               | 8.0±1.8            | 0.15    | 0.64 |                              |             |         |
| MR/LA ratio (%)            | 57±16                 | 45±10              | 0.009   | 0.76 |                              |             |         |
| mean LAP (mmHg)            | 19.5±7.7              | 13.0±4.3           | 0.01    | 0.75 | 1.48                         | 1.04 - 2.12 | 0.03    |
| LA a wave (mmHg)           | 27.8±8.1              | 24.7±7.7           | 0.26    | 0.62 |                              |             |         |
| LA v wave (mmHg)           | 32.2±11.9             | 23.7±7.9           | 0.03    | 0.7  |                              |             |         |
| LV ESP (mmHg)              | 87±19                 | 91±12              | 0.37    | 0.56 |                              |             |         |
| LV EDP(mmHg)               | 19.7±7.6              | 16.1±6.7           | 0.15    | 0.66 |                              |             |         |
| LV DP (mmHg)               | 66.9±22.3             | 75.4±13.3          | 0.17    | 0.61 |                              |             |         |
| HR (bpm)                   | 112±24                | 100±19             | 0.1     | 0.64 |                              |             |         |

p-values are from paired T-test. Abbreviations: AUC=area under the Receiver Operating Characteristic curve, CI=Confidence Interval, DP=developed pressure, EDP=end-diastolic pressure, ESP=end-systolic pressure, EROA=effective regurgitant orifice area, HR=heart rate, LA=left atrium, LV=left ventricle, MR=mitral regurgitation, RF=regurgitant fraction
